# Supplementary material for: Clostridium difficile Alters the Structure and Metabolism of Distinct Cecal Microbiomes during Initial Infection To Promote Sustained Colonization
Source: PubMed Central journal article supplement (PMC6021602; doi:10.1128/msphere.00261-18), 2018-06-27

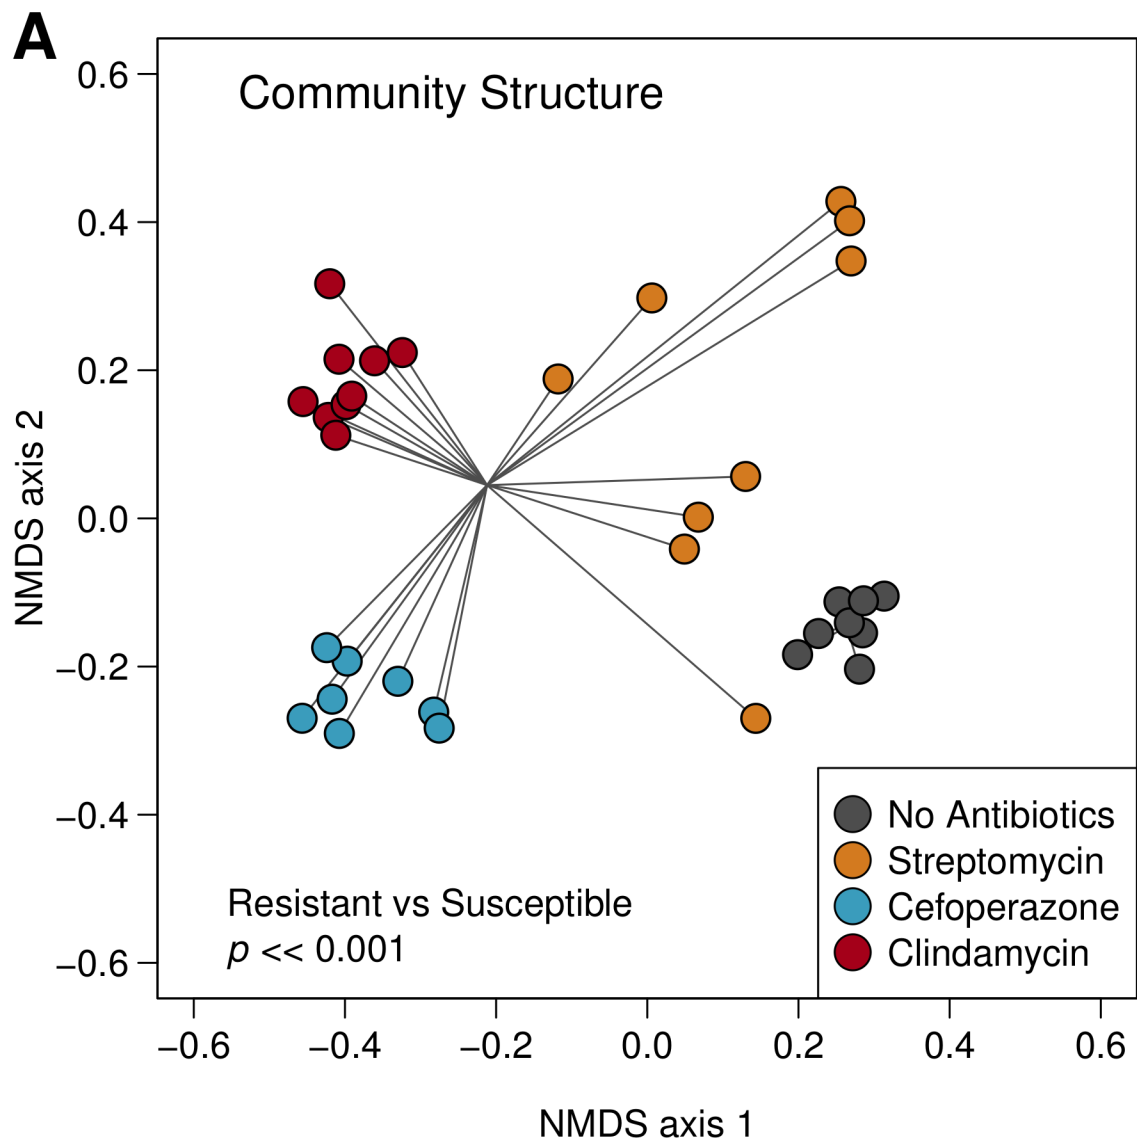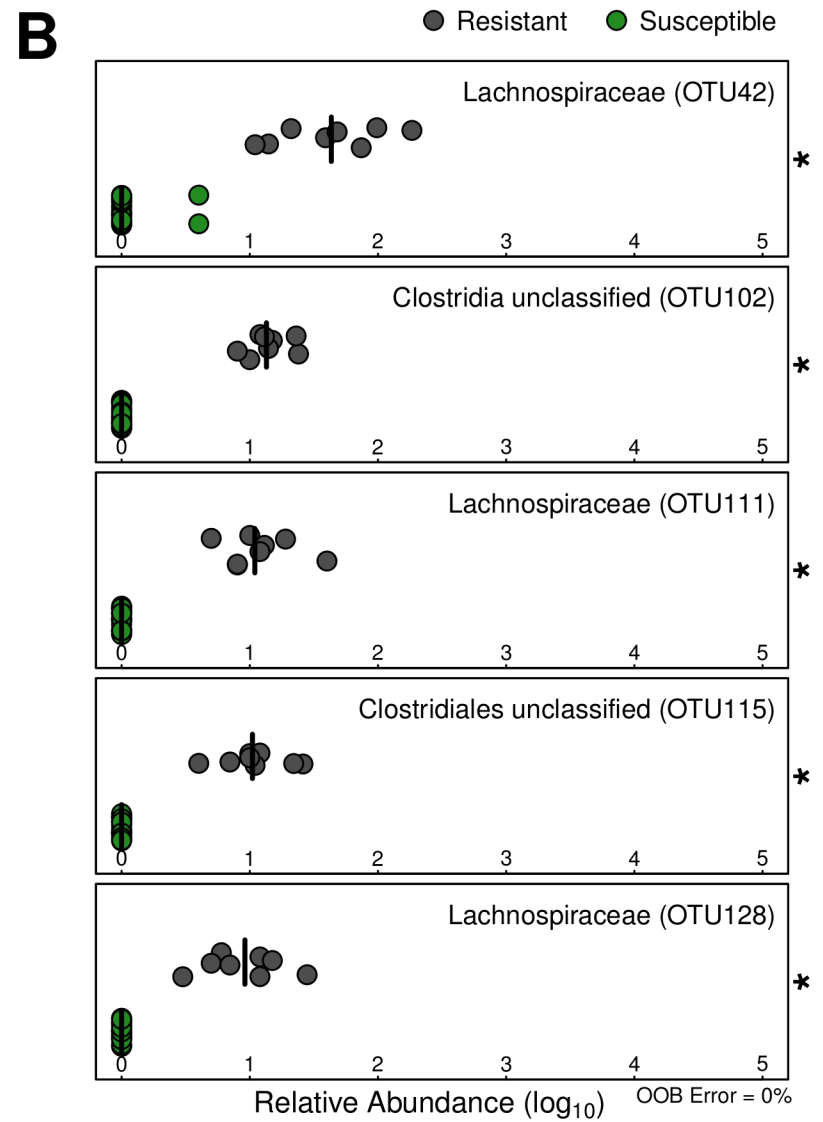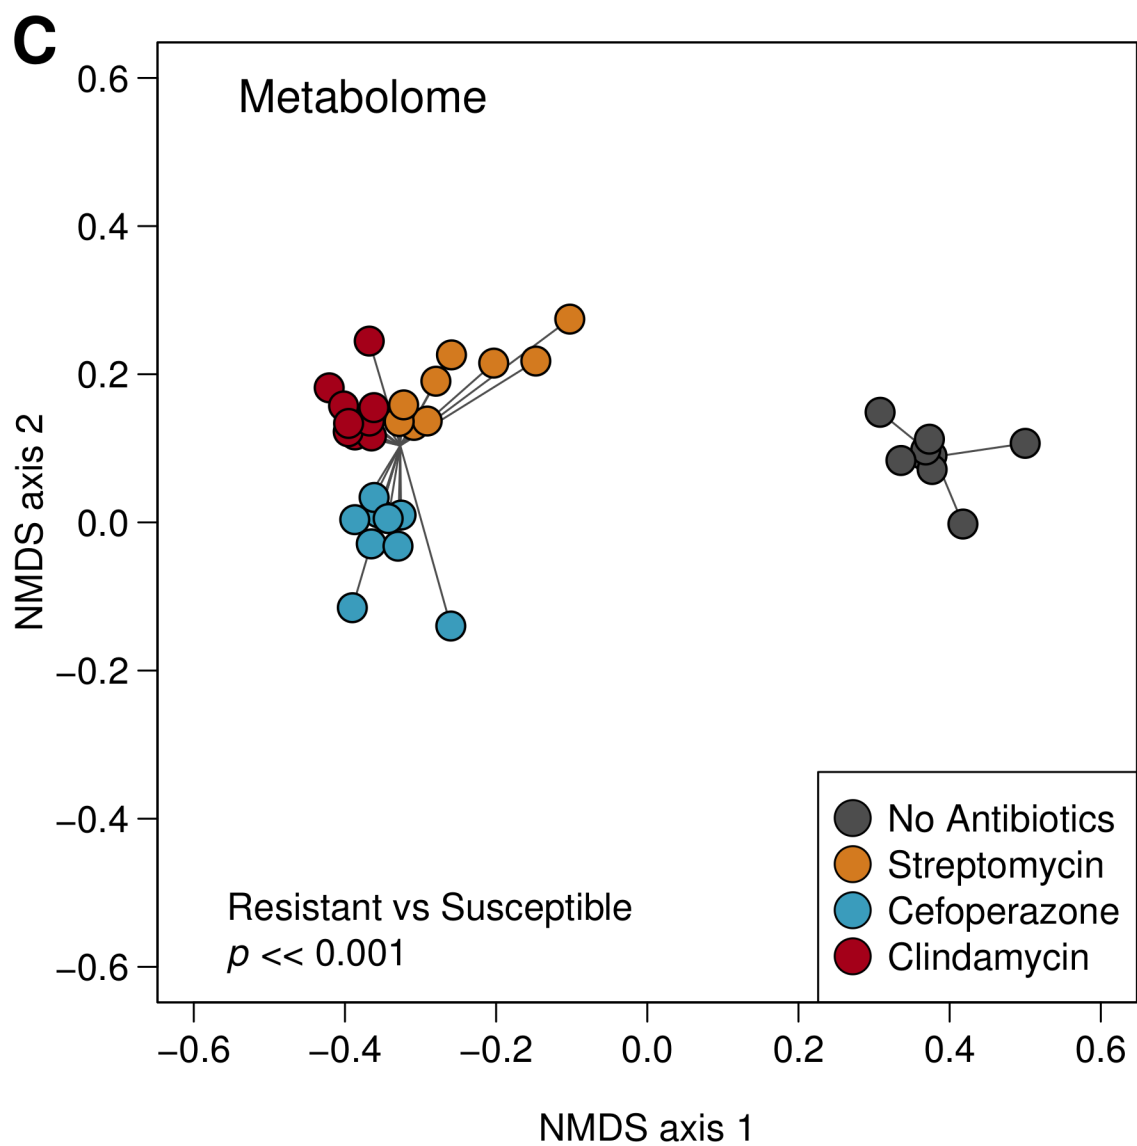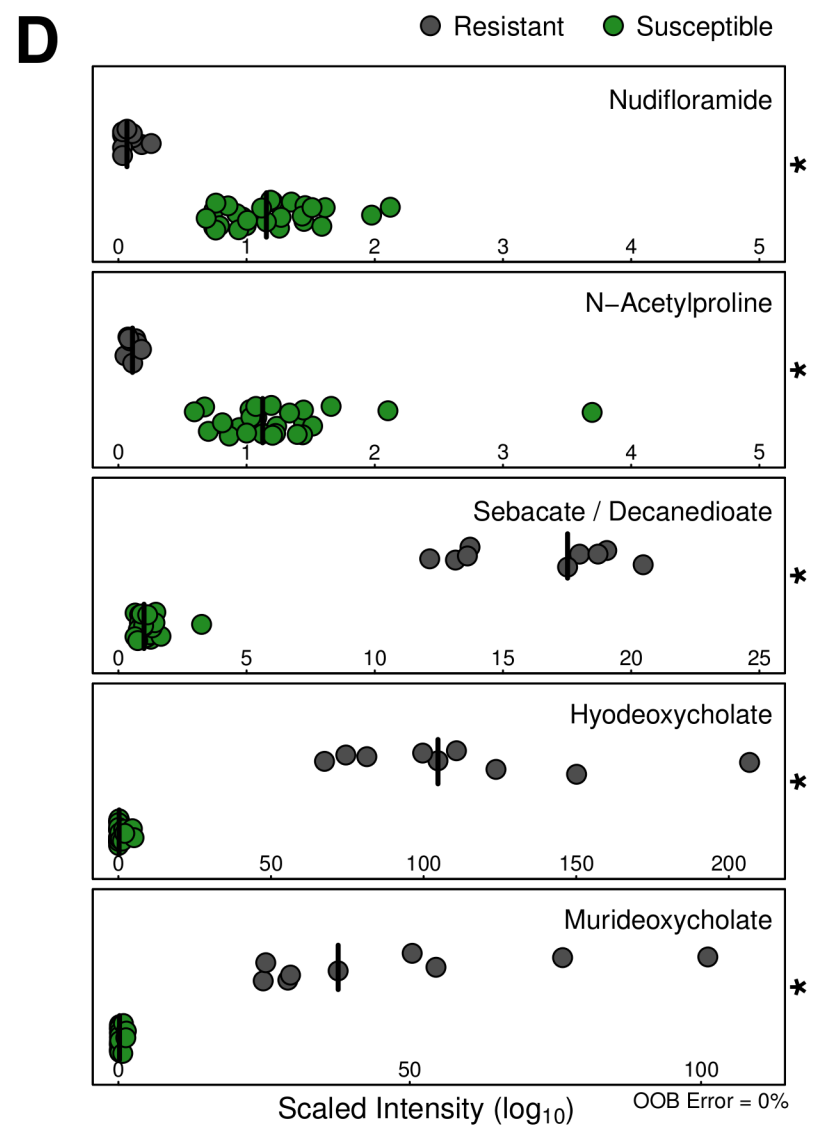

Supplement: sph003182574sf1.pdf [file sph003182574sf1.pdf]
